# Supplementary material for: A comparison of supraglacial meltwater features throughout contrasting melt seasons: southwest Greenland
Source: Copernicus journal article supplement (doi:10.5194/tc-19-1047-2025), 2025-03-06
Supplement: Supplementary file 1 [file tc-19-1047-2025-supplement.zip]

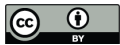

## *Supplement of*

# **A comparison of supraglacial meltwater features throughout contrasting melt seasons: southwest Greenland**

**Emily Glen et al.**

*Correspondence to:* Emily Glen (e.glen@lancaster.ac.uk)

- tc-19-1047-2025-supplement-title-page.pdf
- Supplement
  - Supplement\_to\_glen\_et\_al\_v3.pdf
  - Supplementary Animation 1.gif
  - Supplementary Animation 2.gif

The copyright of individual parts of the supplement might differ from the article licence.
