# Supplementary material for: A comparison of supraglacial meltwater features throughout contrasting melt seasons: southwest Greenland
Source: Copernicus journal article supplement (doi:10.5194/tc-19-1047-2025), 2025-03-06
Supplement: Supplementary file 2 [file tc-19-1047-2025-supplement.zip]

# **Supplementary Information for: *A comparison of supraglacial meltwater features throughout contrasting melt seasons: Southwest Greenland***

**by E. Glen et al.**

## **Supplementary Methods**

### *Supplementary Methods 1: Sensor resolution*

An evaluation between meltwater feature areas derived from L8 and S2 images was undertaken to determine whether sensor resolution impacts SGL detection accuracy. Individual lake areas of overlapping lake polygons across the whole catchment, derived from L8 and S2 images from 8 June, 3 July and 29 August 2019, were compared. We found a strongly significant relationship between both lake area datasets on all of these three dates (with  $R^2$  values of 0.98 on 8 June, 0.93 on 3 July and 0.98 on 29 August; Figure S1). There were no overlapping S2 and L8 images in the 2018 melt season to compare. Although it has previously been shown that S2 imagery can detect meltwater at the boundaries of hard to distinguish lakes more accurately than L8 (i.e. Arthur et al., 2020a), here we conclude that sensor resolution does not have a significant impact on our ability to accurately detect meltwater or calculate SGL area, and both sensors can be used in conjunction for such analysis.

### *Supplementary Methods 2: Partitioning of lake drainage events into rapid vs. slow*

We use our 2019 dataset of SGLs to highlight the influence of the time-scale of image availability on rapid and slow SGL drainage events. An SGL was determined to drain rapidly if  $> 80\%$  of its volume was lost over a period of 1-5 days, and an SGL was determined to drain slowly if it lost 20% of its volume over any time period (Figure S2a). The proportion of rapid drainage events changes when the time threshold changes, highlighting how the number of drainage days used to determine a rapid drainage event can alter results considerably; the difference between 3 days and 4 days is particularly notable. The typical time that previous studies have used to determine a rapid SGL drainage event is 4 days (Figure S2b).

### *Supplementary Methods 3: Refreezing cross referencing*

To provide some validation for our approach to determine if an SGL has refrozen or not, we cross referenced a subset of our refreezing lakes with two independent datasets of buried lakes acquired from SAR imagery in both years (Dunmire et al., 2021; Zheng et al., 2023) (Figure S3). This is undertaken under the assumption that refrozen lakes essentially become buried

31 lakes after refreezing. We find good agreement in the locations of refreezing lakes in our dataset  
32 when compared to the other two datasets. We suggest that differences in the locations of these  
33 refrozen lakes are due to differing NDWI thresholds used to produce the three datasets.

# Supplementary Figures

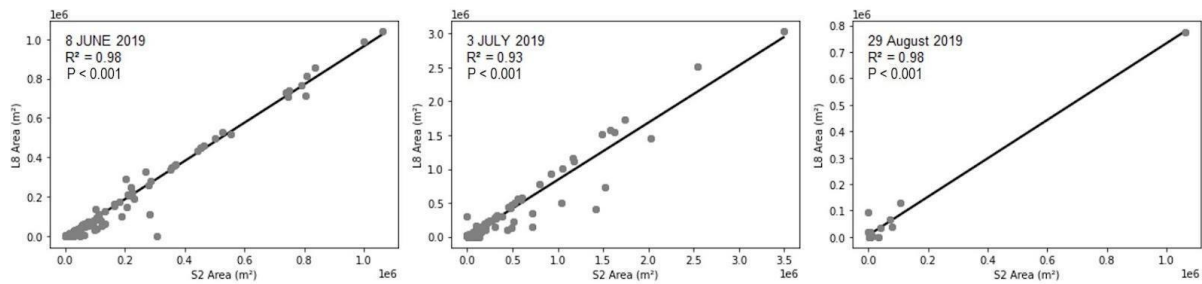

**Figure S1: Lake area frequency distribution from three overlapping Landsat 8 and Sentinel-2 image scenes throughout the 2019 melt season.**

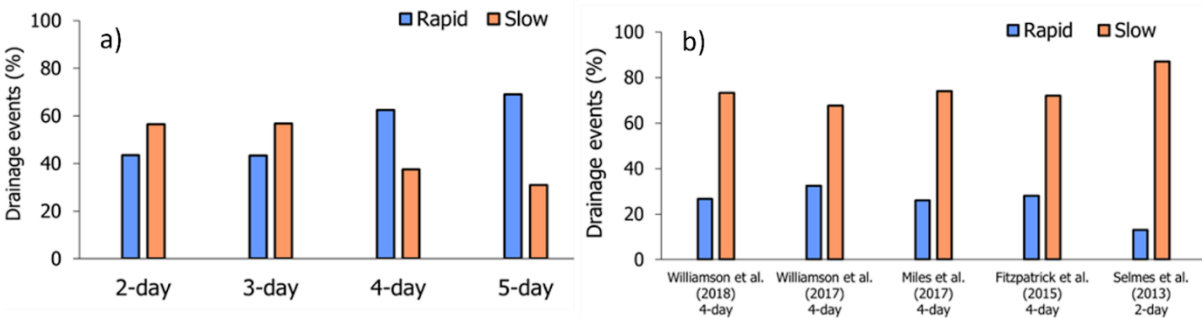

**Figure S2: Partitioning of lake drainage events. a) Percentage of rapid and slow SGL drainage events in 2019 (y axis) and the number of days determining rapid drainage (x axis). b) Frequency of rapid and slow SGL drainage events from previous SW Greenland studies.**

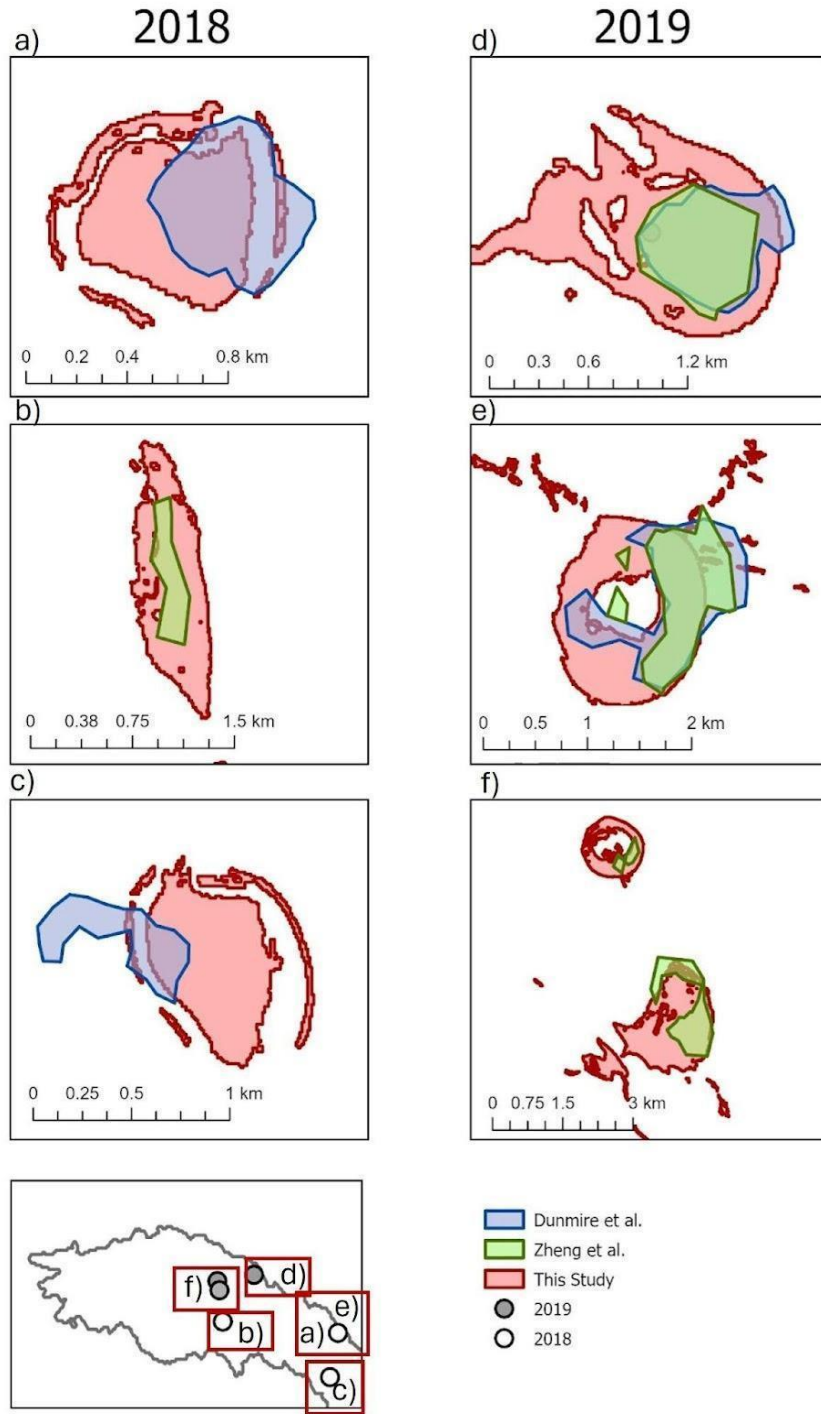

42

43 **Figure S3: Cross referencing a subset of refreezing lakes in this study with maps of subsurface lakes**  
 44 **acquired from SAR imagery in both 2018 (left) and 2019 (right). Blue: dataset from Dunmire et al. (2021);**  
 45 **green: dataset from Zheng et al. (2023); red: Data from this study. Coordinates of lakes in WGS 1984 UTM**  
 46 **Zone 22N: a) 47.3861245°W 66.9952765°N, b) 48.4755826°W 67.0147779°N, c) 47.4456300°W**  
 47 **66.8319809°N, d) 48.2075289°W 67.1934572°N e) 47.3873357°W 66.9953815°N , f) 48.5521200°W**  
 48 **67.1620352°N.**

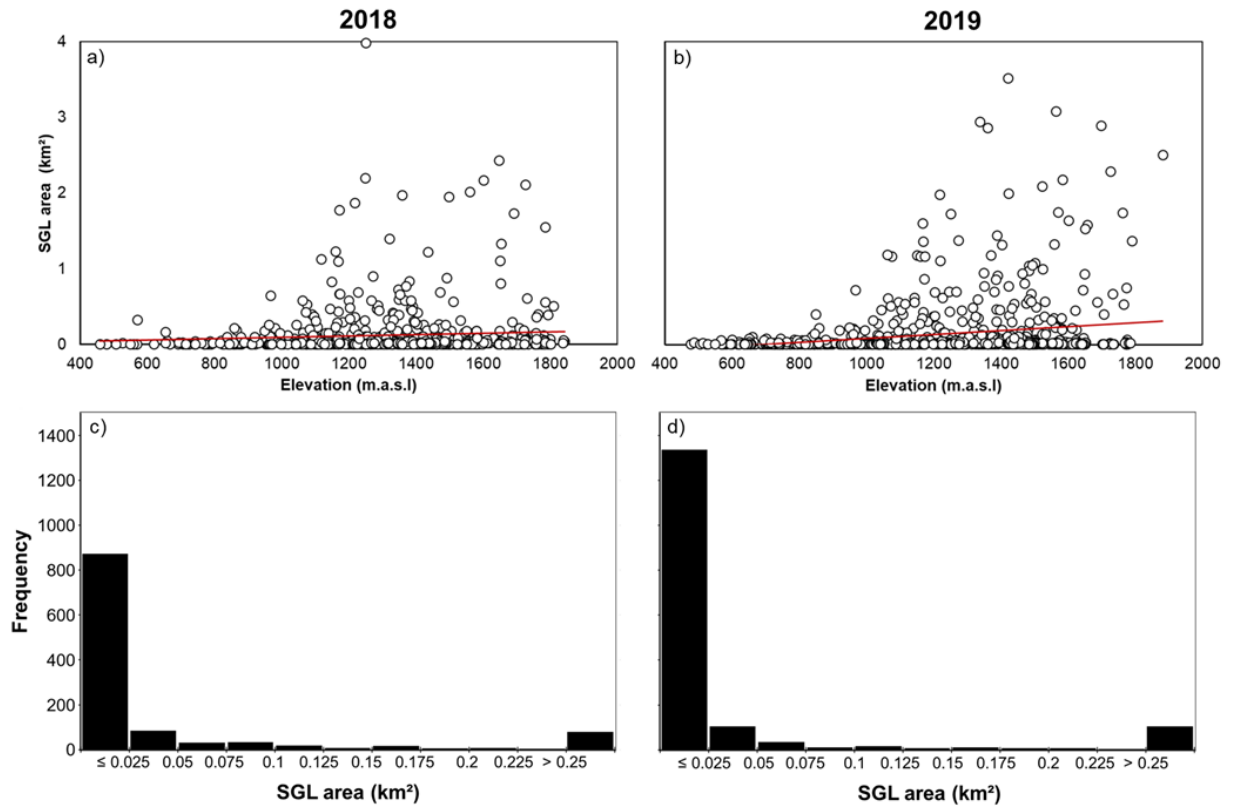

**Figure S4: Scatter plots (a) and (b) displaying the relationship between SGL area and elevation for 2018 and 2019, respectively. Histograms (c) and (d) showing the frequency distribution of SGL areas separated into 10 different bins for 2018 and 2019, respectively.**

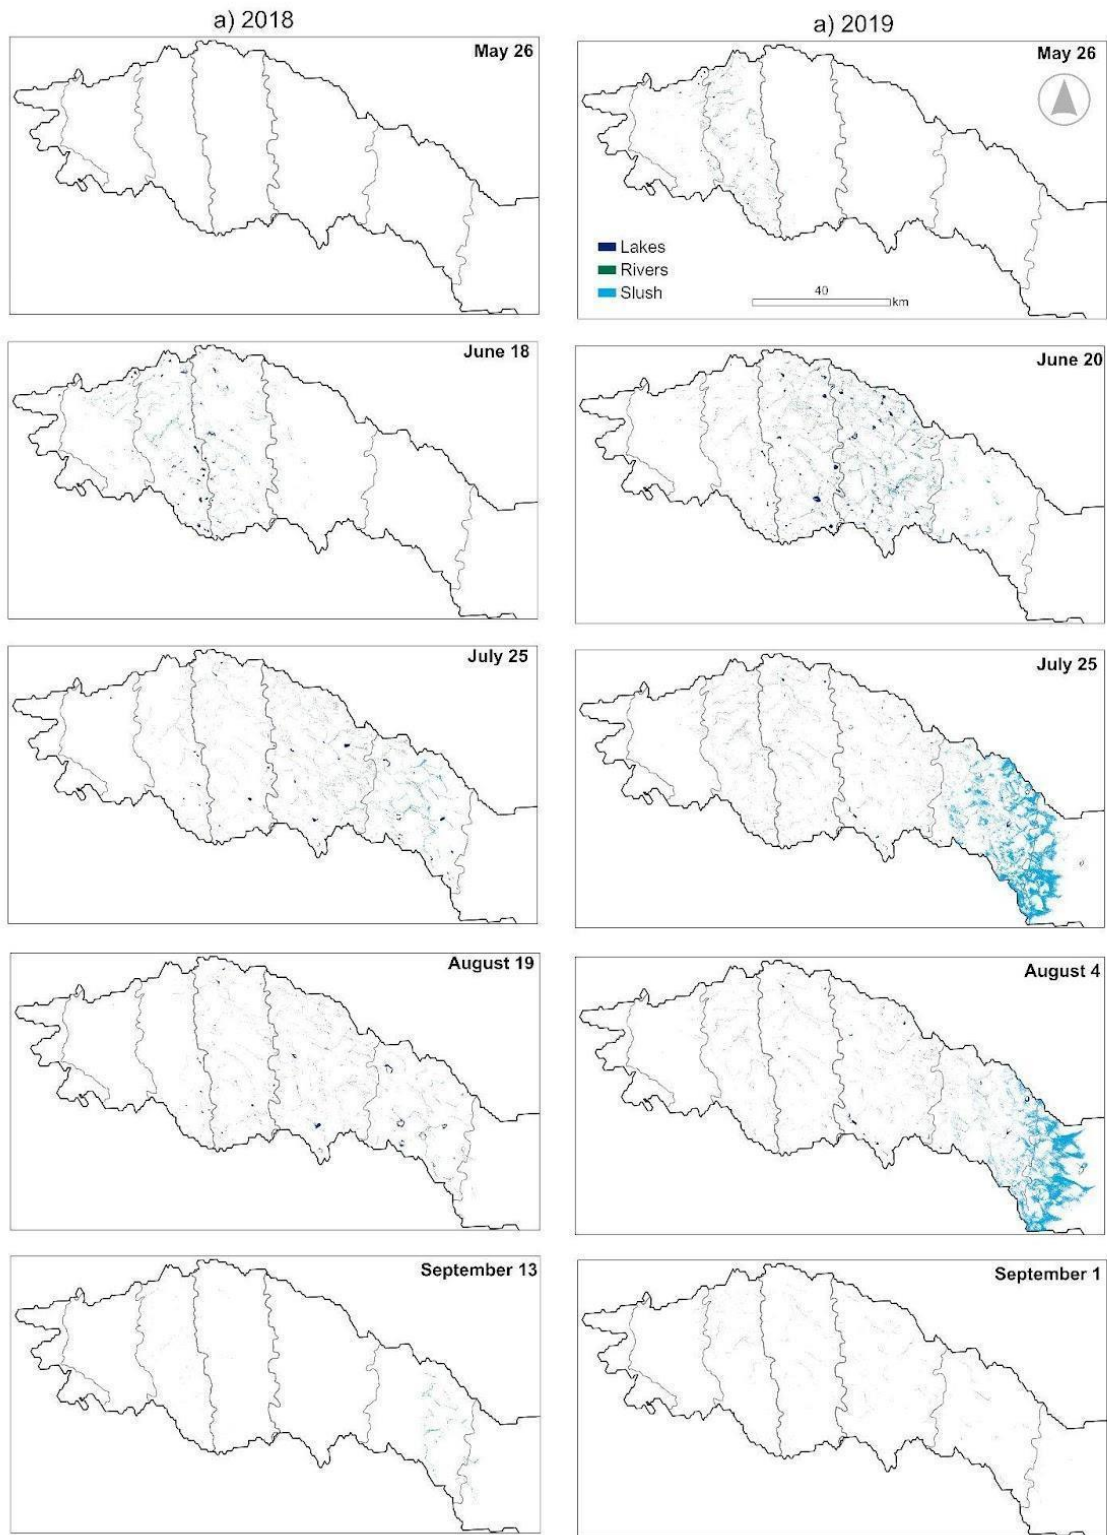

**Figure S5: Areal extent monthly snapshots of supraglacial meltwater features in 2018 (a) and 2019 (b) within the Russell/Leverett Glacier catchment derived from ArcticDEM (black outline). Slush is light blue, channels are green, and lakes are dark blue. Elevation contours from the ArcticDEM are shown in grey.**

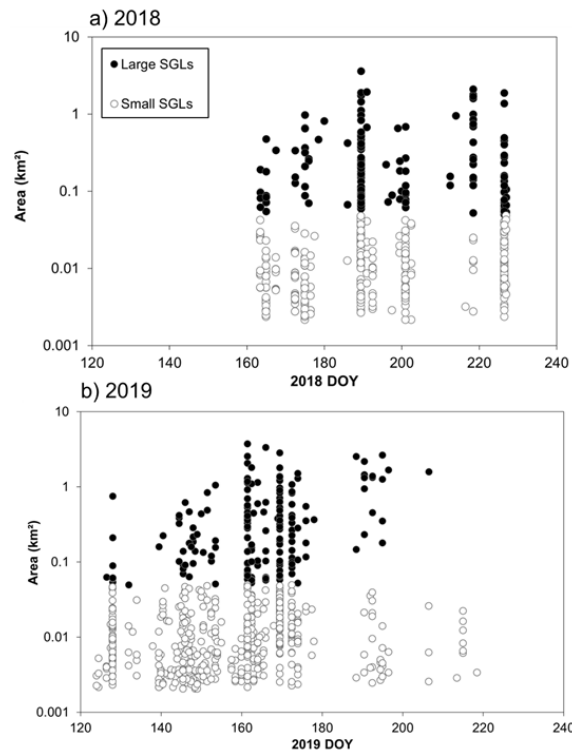

**Figure S6: Seasonal variation in the area of draining SGLs in 2018 (a) and 2019 (b). The area of large draining SGLs ( $>0.0495 \text{ km}^2$ ; solid black circles) and small draining SGLs ( $\geq 0.0018$  and  $\leq 0.0495 \text{ km}^2$ ; open circles) is plotted on a logarithmic scale against the day of the year (DOY).**

## 61    **Supplementary Animations**

62    Animations are provided as a separate file.

63    *Supplementary Animation 1:*

64    Animated monthly progression of supraglacial meltwater features in 2018 within the  
65    Russell/Leverett Glacier catchment, derived from ArcticDEM (black outline). Slush is  
66    represented in light blue, channels in green, and lakes in dark blue. Elevation contours from  
67    the ArcticDEM are shown in grey.

68    *Supplementary Animation 2:*

69    Animated monthly progression of supraglacial meltwater features in 2019 within the  
70    Russell/Leverett Glacier catchment, derived from ArcticDEM (black outline). Slush is  
71    represented in light blue, channels in green, and lakes in dark blue. Elevation contours from  
72    the ArcticDEM are shown in grey.

## 73 Supplementary Tables

74 **Table S1: details of all Sentinel-2 (S2) and Landsat 8 (L8) satellite imagery used in this study.**

| Scene ID                                                     | Date      | Satellite | Cloud Cover (%) |
|--------------------------------------------------------------|-----------|-----------|-----------------|
| S2A_MSIL1C_20180516T150041_N0206_R125_T22WEV_20180516T170011 | 16-May-18 | S2        | 9.8             |
| S2A_MSIL1C_20180516T150041_N0206_R125_T22WV_20180516T170011  | 16-May-18 | S2        | 87.7            |
| S2A_MSIL1C_20180526T145921_N0206_R125_T22WEV_20180526T201815 | 26-May-18 | S2        | 68.6            |
| S2A_MSIL1C_20180526T145921_N0206_R125_T22WV_20180526T201815  | 26-May-18 | S2        | 60.2            |
| LC08_L1TP_008013_20180605_20200831_02_T1                     | 05-Jun-18 | L8        | 35.4            |
| S2B_MSIL1C_20180610T150009_N0206_R125_T22WEV_20180610T183746 | 10-Jun-18 | S2        | 16.1            |
| S2B_MSIL1C_20180610T150009_N0206_R125_T22WV_20180610T183746  | 10-Jun-18 | S2        | 82.8            |
| S2A_MSIL1C_20180615T145911_N0206_R125_T22WEV_20180615T170226 | 15-Jun-18 | S2        | 34.3            |
| S2A_MSIL1C_20180615T145911_N0206_R125_T22WV_20180615T170226  | 15-Jun-18 | S2        | 43.1            |
| S2A_MSIL1C_20180618T150911_N0206_R025_T22WEV_20180618T185402 | 18-Jun-18 | S2        | 4.9             |
| S2A_MSIL1C_20180618T150911_N0206_R025_T22WV_20180618T185402  | 18-Jun-18 | S2        | 22.6            |
| S2B_MSIL1C_20180703T150909_N0206_R025_T22WEV_20180703T201427 | 03-Jul-18 | S2        | 71.9            |
| S2B_MSIL1C_20180703T150909_N0206_R025_T22WV_20180703T201427  | 03-Jul-18 | S2        | 19.6            |
| LC08_L1TP_008013_20180707_20200831_02_T1                     | 07-Jul-18 | L8        | 31.2            |
| S2B_MSIL1C_20180710T150009_N0206_R125_T22WEV_20180710T202212 | 10-Jul-18 | S2        | 5.0             |
| S2B_MSIL1C_20180710T150009_N0206_R125_T22WV_20180710T202212  | 10-Jul-18 | S2        | 94.5            |
| S2B_MSIL1C_20180713T151139_N0206_R025_T22WEV_20180713T200909 | 13-Jul-18 | S2        | 4.3             |
| S2B_MSIL1C_20180713T151139_N0206_R025_T22WV_20180713T200909  | 13-Jul-18 | S2        | 0.3             |
| S2A_MSIL1C_20180725T145911_N0206_R125_T22WEV_20180725T185310 | 25-Jul-18 | S2        | 89.9            |
| S2A_MSIL1C_20180725T145911_N0206_R125_T22WV_20180725T185310  | 25-Jul-18 | S2        | 25.1            |
| S2B_MSIL1C_20180730T150009_N0206_R125_T22WEV_20180730T202856 | 30-Jul-18 | S2        | 0.1             |
| S2B_MSIL1C_20180730T150009_N0206_R125_T22WV_20180730T202856  | 30-Jul-18 | S2        | 0.2             |
| S2A_MSIL1C_20180810T151911_N0206_R068_T22WEV_20180810T202556 | 10-Aug-18 | S2        | 2.5             |
| S2A_MSIL1C_20180810T151911_N0206_R068_T22WV_20180810T202556  | 10-Aug-18 | S2        | 0.0             |
| S2B_MSIL1C_20180819T145959_N0206_R125_T22WEV_20180819T200111 | 19-Aug-18 | S2        | 26.2            |
| S2B_MSIL1C_20180819T145959_N0206_R125_T22WV_20180819T200111  | 19-Aug-18 | S2        | 9.3             |
| S2A_MSIL1C_20180824T145911_N0206_R125_T22WEV_20180824T190305 | 24-Aug-18 | S2        | 59.8            |
| S2A_MSIL1C_20180824T145911_N0206_R125_T22WV_20180824T190305  | 24-Aug-18 | S2        | 65.3            |
| S2A_MSIL1C_20180913T145911_N0206_R125_T22WEV_20180913T171024 | 13-Sep-18 | S2        | 0.0             |
| S2A_MSIL1C_20180913T145911_N0206_R125_T22WV_20180913T171024  | 13-Sep-18 | S2        | 0.0             |
| S2B_MSIL1C_20180918T145959_N0206_R125_T22WEV_20180918T200337 | 18-Sep-18 | S2        | 0.0             |

|                                                              |           |    |      |
|--------------------------------------------------------------|-----------|----|------|
| S2B_MSIL1C_20180918T145959_N0206_R125_T22WV_20180918T200337  | 18-Sep-18 | S2 | 6.9  |
| S2A_MSIL1C_20180919T151911_N0206_R068_T22WEV_20180919T191221 | 19-Sep-18 | S2 | 17.2 |
| S2A_MSIL1C_20180919T151911_N0206_R068_T22WV_20180919T191221  | 19-Sep-18 | S2 | 0.0  |
| S2B_MSIL1C_20180921T151119_N0206_R025_T22WEV_20180921T201342 | 21-Sep-18 | S2 | 28.2 |
| S2B_MSIL1C_20180921T151119_N0206_R025_T22WV_20180921T201342  | 21-Sep-18 | S2 | 95.4 |
| S2B_MSIL1C_20180924T152029_N0206_R068_T22WEV_20180924T202449 | 24-Sep-18 | S2 | 1.2  |
| S2B_MSIL1C_20180924T152029_N0206_R068_T22WV_20180924T202449  | 24-Sep-18 | S2 | 0.0  |
| S2A_MSIL1C_20190501T145921_N0207_R125_T22WEV_20190501T165756 | 01-May-19 | S2 | 1.6  |
| S2A_MSIL1C_20190501T145921_N0207_R125_T22WV_20190501T165756  | 01-May-19 | S2 | 45.5 |
| S2B_MSIL1C_20190502T151809_N0207_R068_T22WEV_20190502T190011 | 02-May-19 | S2 | 0.0  |
| S2B_MSIL1C_20190502T151809_N0207_R068_T22WV_20190502T190011  | 02-May-19 | S2 | 0.0  |
| S2B_MSIL1C_20190506T150019_N0207_R125_T22WEV_20190506T195836 | 06-May-19 | S2 | 2.4  |
| S2B_MSIL1C_20190506T150019_N0207_R125_T22WV_20190506T195836  | 06-May-19 | S2 | 0.7  |
| LC08_L1TP_008013_20190507_20200828_02_T1                     | 07-May-19 | L8 | 3.8  |
| S2B_MSIL1C_20190509T150809_N0207_R025_T22WEV_20190509T184714 | 09-May-19 | S2 | 0.6  |
| S2B_MSIL1C_20190509T150809_N0207_R025_T22WV_20190509T184714  | 09-May-19 | S2 | 13.4 |
| S2A_MSIL1C_20190517T151911_N0207_R068_T22WEV_20190517T171614 | 17-May-19 | S2 | 29.3 |
| S2A_MSIL1C_20190517T151911_N0207_R068_T22WV_20190517T171614  | 17-May-19 | S2 | 0.0  |
| S2B_MSIL1C_20190519T150809_N0207_R025_T22WEV_20190519T184819 | 19-May-19 | S2 | 6.3  |
| S2B_MSIL1C_20190519T150809_N0207_R025_T22WV_20190519T184819  | 19-May-19 | S2 | 7.9  |
| S2B_MSIL1C_20190522T151919_N0207_R068_T22WEV_20190522T171829 | 22-May-19 | S2 | 0.0  |
| S2B_MSIL1C_20190522T151919_N0207_R068_T22WV_20190522T171829  | 22-May-19 | S2 | 0.0  |
| LC08_L1TP_008013_20190523_20200830_02_T1                     | 23-May-19 | L8 | 4.5  |
| S2A_MSIL1C_20190524T150911_N0207_R025_T22WEV_20190524T170812 | 24-May-19 | S2 | 7.9  |
| S2A_MSIL1C_20190524T150911_N0207_R025_T22WV_20190524T170812  | 24-May-19 | S2 | 17.3 |
| LC08_L1TP_006013_20190525_20200828_02_T1                     | 25-May-19 | L8 | 0.7  |
| S2B_MSIL1C_20190526T150019_N0207_R125_T22WEV_20190526T183734 | 26-May-19 | S2 | 0.6  |
| S2B_MSIL1C_20190526T150019_N0207_R125_T22WV_20190526T183734  | 26-May-19 | S2 | 79.1 |
| S2A_MSIL1C_20190527T151911_N0207_R068_T22WEV_20190527T202622 | 27-May-19 | S2 | 0.1  |
| S2A_MSIL1C_20190527T151911_N0207_R068_T22WV_20190527T202622  | 27-May-19 | S2 | 0.0  |
| S2B_MSIL1C_20190529T150809_N0207_R025_T22WEV_20190529T201431 | 29-May-19 | S2 | 7.6  |
| S2B_MSIL1C_20190529T150809_N0207_R025_T22WV_20190529T201431  | 29-May-19 | S2 | 94.1 |
| S2A_MSIL1C_20190531T145921_N0207_R125_T22WEV_20190531T165832 | 31-May-19 | S2 | 3.7  |
| S2A_MSIL1C_20190531T145921_N0207_R125_T22WV_20190531T165832  | 31-May-19 | S2 | 22.6 |
| S2B_MSIL1C_20190601T151809_N0207_R068_T22WEV_20190601T184204 | 01-Jun-19 | S2 | 13.6 |

|                                                              |           |    |      |
|--------------------------------------------------------------|-----------|----|------|
| S2B_MSIL1C_20190601T151809_N0207_R068_T22WV_20190601T184204  | 01-Jun-19 | S2 | 0.0  |
| S2B_MSIL1C_20190605T150019_N0207_R125_T22WEV_20190605T200407 | 05-Jun-19 | S2 | 10.1 |
| S2B_MSIL1C_20190605T150019_N0207_R125_T22WV_20190605T200407  | 05-Jun-19 | S2 | 94.0 |
| S2B_MSIL1C_20190608T150809_N0207_R025_T22WEV_20190608T184815 | 08-Jun-19 | S2 | 10.1 |
| S2B_MSIL1C_20190608T150809_N0207_R025_T22WV_20190608T184815  | 08-Jun-19 | S2 | 14.1 |
| LC08_L1TP_006013_20190610_20200828_02_T1                     | 10-Jun-19 | L8 | 1.2  |
| S2A_MSIL1C_20190613T150911_N0207_R025_T22WEV_20190613T170639 | 13-Jun-19 | S2 | 52.6 |
| S2A_MSIL1C_20190613T150911_N0207_R025_T22WV_20190613T170639  | 13-Jun-19 | S2 | 0.9  |
| LC08_L1TP_007013_20190617_20200828_02_T1                     | 17-Jun-19 | L8 | 10.5 |
| S2A_MSIL1C_20190620T145921_N0207_R125_T22WEV_20190620T183937 | 20-Jun-19 | S2 | 0.1  |
| S2A_MSIL1C_20190620T145921_N0207_R125_T22WV_20190620T183937  | 20-Jun-19 | S2 | 0.0  |
| S2A_MSIL1C_20190703T150921_N0207_R025_T22WEV_20190703T184907 | 03-Jul-19 | S2 | 13.9 |
| S2A_MSIL1C_20190703T150921_N0207_R025_T22WV_20190703T184907  | 03-Jul-19 | S2 | 31.8 |
| S2A_MSIL1C_20190707T144921_N0207_R082_T22WEV_20190707T164746 | 07-Jul-19 | S2 | 23.2 |
| S2A_MSIL1C_20190707T144921_N0207_R082_T22WV_20190707T164746  | 07-Jul-19 | S2 | 3.8  |
| S2B_MSIL1C_20190708T150809_N0208_R025_T22WEV_20190708T185223 | 08-Jul-19 | S2 | 0.0  |
| S2B_MSIL1C_20190708T150809_N0208_R025_T22WV_20190708T185223  | 08-Jul-19 | S2 | 0.1  |
| S2B_MSIL1C_20190712T144759_N0208_R082_T22WEV_20190712T164159 | 12-Jul-19 | S2 | 0.0  |
| S2B_MSIL1C_20190712T144759_N0208_R082_T22WV_20190712T164159  | 12-Jul-19 | S2 | 0.0  |
| S2B_MSIL1C_20190715T150019_N0208_R125_T22WEV_20190715T200825 | 15-Jul-19 | S2 | 0.3  |
| S2B_MSIL1C_20190715T150019_N0208_R125_T22WV_20190715T200825  | 15-Jul-19 | S2 | 5.9  |
| S2B_MSIL1C_20190725T150019_N0208_R125_T22WEV_20190725T183725 | 25-Jul-19 | S2 | 21.1 |
| S2B_MSIL1C_20190725T150019_N0208_R125_T22WV_20190725T183725  | 25-Jul-19 | S2 | 0.8  |
| S2B_MSIL1C_20190801T144759_N0208_R082_T22WEV_20190801T164915 | 01-Aug-19 | S2 | 0.0  |
| S2B_MSIL1C_20190801T144759_N0208_R082_T22WV_20190801T164915  | 01-Aug-19 | S2 | 1.8  |
| S2A_MSIL1C_20190802T150921_N0208_R025_T22WEV_20190802T170710 | 02-Aug-19 | S2 | 0.0  |
| S2A_MSIL1C_20190802T150921_N0208_R025_T22WV_20190802T170710  | 02-Aug-19 | S2 | 7.3  |
| S2B_MSIL1C_20190804T150019_N0208_R125_T22WEV_20190804T165643 | 04-Aug-19 | S2 | 4.2  |
| S2B_MSIL1C_20190804T150019_N0208_R125_T22WV_20190804T165643  | 04-Aug-19 | S2 | 17.7 |
| S2A_MSIL1C_20190809T145921_N0208_R125_T22WEV_20190809T165708 | 09-Aug-19 | S2 | 0.6  |
| S2A_MSIL1C_20190809T145921_N0208_R125_T22WV_20190809T165708  | 09-Aug-19 | S2 | 0.0  |
| S2B_MSIL1C_20190811T144759_N0208_R082_T22WEV_20190811T164246 | 11-Aug-19 | S2 | 0.0  |
| S2B_MSIL1C_20190811T144759_N0208_R082_T22WV_20190811T164246  | 11-Aug-19 | S2 | 0.0  |
| S2A_MSIL1C_20190812T150921_N0208_R025_T22WEV_20190812T201743 | 12-Aug-19 | S2 | 0.0  |
| S2A_MSIL1C_20190812T150921_N0208_R025_T22WV_20190812T201743  | 12-Aug-19 | S2 | 11.3 |

|                                                              |           |    |      |
|--------------------------------------------------------------|-----------|----|------|
| S2B_MSIL1C_20190817T150809_N0208_R025_T22WEV_20190817T202054 | 17-Aug-19 | S2 | 52.7 |
| S2B_MSIL1C_20190817T150809_N0208_R025_T22WFV_20190817T202054 | 17-Aug-19 | S2 | 16.4 |
| LC08_L1TP_007013_20190820_20200827_02_T1                     | 20-Aug-19 | L8 | 11.1 |
| S2B_MSIL1C_20190824T150009_N0208_R125_T22WEV_20190824T201004 | 24-Aug-19 | S2 | 5.2  |
| S2B_MSIL1C_20190824T150009_N0208_R125_T22WFV_20190824T201004 | 24-Aug-19 | S2 | 27.8 |
| S2A_MSIL1C_20190825T151911_N0208_R068_T22WEV_20190825T185502 | 25-Aug-19 | S2 | 3.4  |
| S2A_MSIL1C_20190825T151911_N0208_R068_T22WFV_20190825T185502 | 25-Aug-19 | S2 | 0.0  |
| LC08_L1TP_008013_20190827_20200826_02_T1                     | 27-Aug-19 | L8 | 42.5 |
| S2A_MSIL1C_20190829T145921_N0208_R125_T22WEV_20190829T183408 | 29-Aug-19 | S2 | 11.2 |
| S2A_MSIL1C_20190829T145921_N0208_R125_T22WFV_20190829T183408 | 29-Aug-19 | S2 | 99.5 |
| S2B_MSIL1C_20190830T151809_N0208_R068_T22WEV_20190830T185641 | 30-Aug-19 | S2 | 33.3 |
| S2A_MSIL1C_20190901T150911_N0208_R025_T22WEV_20190901T170819 | 01-Sep-19 | S2 | 34.5 |
| S2A_MSIL1C_20190901T150911_N0208_R025_T22WFV_20190901T170819 | 01-Sep-19 | S2 | 24.2 |
| S2B_MSIL1C_20190909T151809_N0208_R068_T22WEV_20190909T202539 | 09-Sep-19 | S2 | 14.6 |
| S2A_MSIL1C_20190918T150011_N0208_R125_T22WEV_20190918T201931 | 18-Sep-19 | S2 | 24.1 |
| S2A_MSIL1C_20190918T150011_N0208_R125_T22WFV_20190918T201931 | 18-Sep-19 | S2 | 98.3 |
| S2B_MSIL1C_20190923T150009_N0208_R125_T22WEV_20190923T200537 | 23-Sep-19 | S2 | 21.1 |
| S2B_MSIL1C_20190923T150009_N0208_R125_T22WFV_20190923T200537 | 23-Sep-19 | S2 | 26.7 |
| S2B_MSIL1C_20190926T150949_N0208_R025_T22WEV_20190926T184849 | 26-Sep-19 | S2 | 0.5  |
| S2B_MSIL1C_20190926T150949_N0208_R025_T22WFV_20190926T184849 | 26-Sep-19 | S2 | 0.0  |
| S2A_MSIL1C_20190928T150011_N0208_R125_T22WEV_20190928T165931 | 28-Sep-19 | S2 | 0.0  |
| S2A_MSIL1C_20190928T150011_N0208_R125_T22WFV_20190928T165931 | 28-Sep-19 | S2 | 18.8 |

**Table S2: Maximum areal coverage and median elevation a.s.l. of all SGL, channel and slush features in 2018 (left) and 2019 (right).**

|                               | 2018   | 2019   |
|-------------------------------|--------|--------|
| <b>Maximum areal coverage</b> |        |        |
| SGLs                          | 1.5%   | 2.1%   |
| Channels                      | 4.5%   | 6.4%   |
| Slush                         | 0.3%   | 12.3%  |
| <b>Median elevation</b>       |        |        |
| SGLs                          | 1350 m | 1250 m |
| Channels                      | 1350 m | 1500 m |
| Slush                         | 1600 m | 1700 m |
